# Supplementary material for: Environmental valorisation of bagasse fly ash: a review
Source: Royal Society of Chemistry journal article supplement (doi:10.1039/d0ra06422j), 2020-01-01
Supplement: d0ra06422j1.pdf [file d0ra06422j1.pdf]

**Supplementary Table: Details of adsorption study for other adsorbate using BFA and its activated forms**

| <b>Sr. No.</b> | <b>Adsorbate</b>                        | <b>Variable</b>                                                                     | <b>Details of adsorption study</b>                                                                        | <b>Maximum adsorption capacity (mg of metal/g of BFA)*</b> | <b>Reference</b> |
|----------------|-----------------------------------------|-------------------------------------------------------------------------------------|-----------------------------------------------------------------------------------------------------------|------------------------------------------------------------|------------------|
| 1              | Phenol & p-Nitrophenol                  | Adsorbent dose, pH, Contact time, Initial concentration, Effect of surfactant       | Adsorption isotherms (Batch); Thermodynamic study; Kinetic analysis; Regeneration of adsorbent            | 7.11 & 8.33 X 10 <sup>6</sup> mol/g                        | 1                |
| 2              | Lindane & Malathion                     | Adsorbent dose, pH, Contact time, Initial concentration, Temperature, Particle size | Adsorption isotherms (Batch and Column); Thermodynamic study; Kinetic analysis; Regeneration of adsorbent | 0.00251 & 0.00208                                          | 2                |
| 3              | Acrylonitrile                           | Adsorbent dose, pH, Contact time, Initial concentration, Particle size              | Thermodynamic study; Kinetic analysis                                                                     | 83.34 (Pseudo-second-order)                                | 3                |
| 4              | COD from diary effluent                 | Adsorbent dose, Contact time, , Temperature,                                        | Adsorption isotherms (Batch), Thermodynamic study; Kinetic analysis                                       | 278.497                                                    | 4                |
| 5              | Pyridine                                | Adsorbent dose, pH, Contact time, Initial concentration, Temperature                | Adsorption isotherms (Batch); Thermodynamic study; Kinetic analysis; Error analysis                       | 31.06                                                      | 5                |
| 6              | 2-Picoline                              | Adsorbent dose, pH, Contact time, Initial concentration                             | Adsorption isotherms (Batch); Kinetic analysis; Regeneration of adsorbent                                 | 60.976                                                     | 6                |
| 7              | 4-Picoline                              | Adsorbent dose, pH, Contact time, Initial concentration, Temperature                | Adsorption isotherms (Batch); Kinetic analysis; Regeneration of adsorbent                                 | 60.61                                                      | 7                |
| 8              | Colour from printing ink industry       | pH                                                                                  | Adsorption isotherms (Batch); Kinetic analysis                                                            | 29.07                                                      | 8                |
| 9              | COD and colour from molasses spent wash | Adsorbent dose, pH, Contact time, Initial concentration                             | Adsorption isotherms (Batch); Kinetic analysis; Statistical analysis                                      | 124.80                                                     | 9                |
| 10             | Quinoline                               | Adsorbent dose, pH,                                                                 | Adsorption isotherms                                                                                      | 175                                                        | 10               |

|    |                                      |                                                                      |                                                                                                           |                |    |
|----|--------------------------------------|----------------------------------------------------------------------|-----------------------------------------------------------------------------------------------------------|----------------|----|
|    |                                      | Contact time, Initial concentration, Temperature                     | (Batch); Kinetic analysis; Regeneration of adsorbent                                                      |                |    |
| 11 | Pyridine & Quinoline                 | Initial concentration, Temperature                                   | Adsorption isotherms (Batch); Thermodynamic study                                                         | 174.72 & 20.3  | 11 |
| 12 | Furfural                             | Adsorbent dose, pH, Contact time, Initial concentration, Temperature | Adsorption isotherms (Batch); Kinetic analysis; Thermodynamic study                                       | 81.9672        | 12 |
| 13 | Phenol                               | Adsorbent dose, pH, Contact time, Initial concentration, Temperature | Adsorption isotherms (Batch); Regeneration of adsorbent                                                   | 35.43          | 13 |
| 14 | p-Nitrophenol                        | Adsorbent dose, pH, Contact time, Initial concentration, Temperature | Adsorption isotherms (Batch); Thermodynamic study; Kinetic analysis; Regeneration of adsorbent            | 91.99          | 14 |
| 15 | 2-Chlorophenol                       | pH, Initial concentration, Temperature                               | Adsorption isotherms (Batch); Thermodynamic study; Kinetic analysis; Regeneration of adsorbent            | 85.68          | 15 |
| 16 | Aniline                              | Adsorbent dose, pH, Contact time, Initial concentration, Temperature | Adsorption isotherms (Batch); Thermodynamic study; Kinetic analysis                                       | 49.45          | 16 |
| 17 | Monocrotophos                        | Adsorbent dose, pH, Contact time, Initial concentration, Temperature | Adsorption isotherms (Batch); Thermodynamic study; Kinetic analysis                                       | 52.632         | 17 |
| 18 | COD & colour of paper mill effluents | Adsorbent dose, pH, Contact time, Initial concentration              | Adsorption isotherms (Batch); Thermodynamic study; Kinetic analysis; Regeneration of adsorbent            | 2156.4 & 307.1 | 18 |
| 19 | Phenol                               | Column (Flow rate, Bed height, Initial concentration)                | Adsorption isotherms (Batch and Column)                                                                   | 9.93           | 19 |
| 20 | Benzoic acid                         | Adsorbent dose, Contact time, Initial concentration, Temperature     | Adsorption isotherms (Batch); Thermodynamic study; Kinetic analysis; Regeneration of adsorbent            | 25.10          | 20 |
| 21 | Phenol                               | Adsorbent dose, Contact time, Initial concentration, Temperature     | Adsorption isotherms (Batch and Column); Thermodynamic study; Kinetic analysis; Regeneration of adsorbent | 77.28          | 21 |

|    |                       |                                                                  |                                                                     |      |    |
|----|-----------------------|------------------------------------------------------------------|---------------------------------------------------------------------|------|----|
| 22 | COD from PTA effluent | Adsorbent dose, Contact time, Initial concentration, Temperature | Adsorption isotherms (Batch); Thermodynamic study; Kinetic analysis | 26.9 | 22 |
|----|-----------------------|------------------------------------------------------------------|---------------------------------------------------------------------|------|----|

\* The value of the maximum adsorption capacity is corresponds to the Langmuir Isotherm.

## Reference

1. V. K. Gupta, S. Sharma, I. S. Yadav and D. Mohan, *Journal of Chemical Technology & Biotechnology*, 1998, **71**, 180-186.
2. V. K. Gupta, C. K. Jain, I. Ali, S. Chandra and S. Agarwala, *Water Research*, 2002, **36**, 2483-2490.
3. A. Kumar, B. Prasad and I. M. Mishra, *Journal of Water Process Engineering*, 2014, **2**, 129-133.
4. J. P. Kushwaha, V. C. Srivastava and I. D. Mall, *Bioresource technology*, 2010, **101**, 3474-3483.
5. D. H. Lataye, I. M. Mishra and I. D. Mall, *Industrial & Engineering Chemistry Research*, 2006, **45**, 3934-3943.
6. D. H. Lataye, I. M. Mishra and I. D. Mall, *Chemical Engineering Journal*, 2008, **138**, 35-46.
7. D. H. Lataye, I. M. Mishra and I. D. Mall, *Journal of Environmental Engineering*, 2011, **137**, 1048-1057.
8. S. Noonpui, P. Thiravetyan, W. Nakbanpote and S. Netpradit, *Chemical Engineering Journal*, 2010, **162**, 503-508.
9. J. F. Nure, N. T. Shibeshi, S. L. Asfaw, W. Audenaert and S. W. H. Van Hulle, *Water SA*, 2017, **43**, 470.
10. D. Rameshraj, V. C. Srivastava, J. P. Kushwaha and I. D. Mall, *Chemical Engineering Journal*, 2012, **181-182**, 343-351.
11. D. Rameshraj, V. C. Srivastava, J. P. Kushwaha and I. D. Mall, *Chemical Papers*, 2017, **72**, 617-628.
12. A. K. Sahu, I. D. Mall and V. C. Srivastava, *Chemical Engineering Communications*, 2007, **195**, 316-335.

13. B. Shah, R. Tailor and a. A. Shah, *Environmental Progress & Sustainable Energy*, 2011, **30**, 358-367.
14. B. Shah, R. Tailor and A. Shah, *Environmental science and pollution research international*, 2012, **19**, 1171-1186.
15. B. Shah, R. Tailor and A. Shah, *Journal of Chemical Technology & Biotechnology*, 2011, **86**, 1265-1275.
16. B. A. Shah, A. A. Abebe and A. V. Shah, *Arabian Journal for Science and Engineering*, 2016, **42**, 139-152.
17. B. Shah, D. Pandya, H. Patel and A. Shah, *International Journal of Environment and Waste Management*, 2017, **20**, 1-20.
18. V. C. Srivastava, I. D. Mall and I. M. Mishra, *Colloids and Surfaces A: Physicochemical and Engineering Aspects*, 2005, **260**, 17-28.
19. V. C. Srivastava, B. Prasad, I. M. Mishra, I. D. Mall and M. M. Swamy, *Industrial & Engineering Chemistry Research*, 2008, **47**, 1603-1161.
20. S. Suresh, *Journal of The Institution of Engineers (India): Series A*, 2013, **93**, 151-161.
21. R. Tailor, B. Shah and A. Shah, *Journal of Chemical & Engineering Data*, 2012, **57**, 1437-1448.
22. S. Verma, B. Prasad and I. M. Mishra, *Environmental Science And Pollution Research International*, 2017, **24**, 1953-1966.
